# Supplementary material
Source: publisher site journal article supplement (https://www.spandidos-publications.com/3857/downloadSupplementary)

Figure S1. miR-3609 expression in MDA-MB-231 cells transfected with 40, 80 and 160 nM miR-3609 mimics or the corresponding control. \*\*\*\*P<0.0001 vs. the NC group. miR, microRNA; NC, negative control.

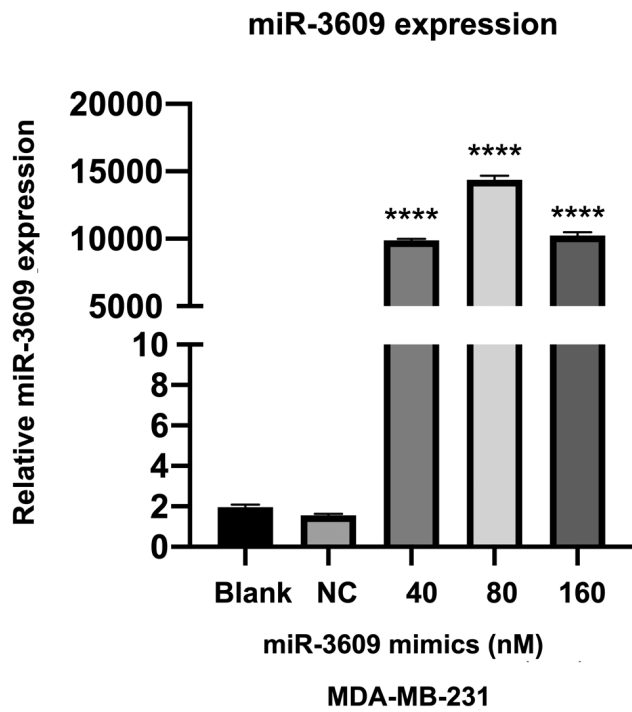

Supplement: Supplementary file 1 [file downloadSupplementary]
